# Supplementary material for: Who Is the Best Player Ever? A Complex Network Analysis of the History of Professional Tennis
Source: PLOS journal article supplement (doi:10.1371/journal.pone.0017249), 2011-02-09
Supplement: S3 (10.1371/journal.pone.0017249.s003) [file journal.pone.0017249.s003]

| Rank | Player              | Country            | Hand | Start | End  |
|------|---------------------|--------------------|------|-------|------|
| 1    | Pete Sampras        | United States      | R    | 1988  | 2002 |
| 2    | Andre Agassi        | United States      | R    | 1986  | 2006 |
| 3    | Michael Chang       | United States      | R    | 1987  | 2003 |
| 4    | Goran Ivanisevic    | Croatia            | L    | 1988  | 2004 |
| 5    | Yevgeny Kafelnikov  | Russian Federation | R    | 1992  | 2003 |
| 6    | Jim Courier         | United States      | R    | 1987  | 2000 |
| 7    | Richard Krajicek    | Netherlands        | R    | 1991  | 2003 |
| 8    | Thomas Muster       | Austria            | L    | 1984  | 1999 |
| 9    | Wayne Ferreira      | South Africa       | R    | 1990  | 2004 |
| 10   | Thomas Enqvist      | Sweden             | R    | 1989  | 2005 |
| 11   | Boris Becker        | Germany            | R    | 1983  | 1999 |
| 12   | Stefan Edberg       | Sweden             | R    | 1982  | 1996 |
| 13   | Sergi Bruguera      | Spain              | R    | 1988  | 2002 |
| 14   | Marc Rosset         | Switzerland        | R    | 1988  | 2004 |
| 15   | Petr Korda          | Czech Republic     | L    | 1985  | 1999 |
| 16   | Todd Martin         | United States      | R    | 1990  | 2004 |
| 17   | Cedric Pioline      | France             | R    | 1989  | 2002 |
| 18   | Michael Stich       | Germany            | R    | 1989  | 1997 |
| 19   | Alex Corretja       | Spain              | R    | 1992  | 2005 |
| 20   | Patrick Rafter      | Australia          | R    | 1991  | 2001 |
| 21   | Magnus Gustafsson   | Sweden             | R    | 1986  | 2001 |
| 22   | Andrei Medvedev     | Ukraine            | R    | 1990  | 2001 |
| 23   | Francisco Clavet    | Spain              | L    | 1988  | 2003 |
| 24   | Marcelo Rios        | Chile              | L    | 1994  | 2003 |
| 25   | Greg Rusedski       | Great Britain      | L    | 1992  | 2006 |
| 26   | Fabrice Santoro     | France             | R    | 1989  | 2010 |
| 27   | Magnus Larsson      | Sweden             | R    | 1988  | 2003 |
| 28   | Tim Henman          | Great Britain      | R    | 1994  | 2007 |
| 29   | Alberto Berasategui | Spain              | R    | 1992  | 2001 |
| 30   | Albert Costa        | Spain              | R    | 1993  | 2006 |
