# Supplementary material for: Who Is the Best Player Ever? A Complex Network Analysis of the History of Professional Tennis
Source: PLoS One. 2011 Feb 9;6(2):e17249. doi: 10.1371/journal.pone.0017249 (PMC3037277; doi:10.1371/journal.pone.0017249)
Supplement: Table S4 — Top 30 players of the period 2001–2010. (PDF) [file pone.0017249.s004.pdf]

| Rank | Player              | Country            | Hand | Start | End  |
|------|---------------------|--------------------|------|-------|------|
| 1    | Roger Federer       | Switzerland        | R    | 1998  | 2010 |
| 2    | Rafael Nadal        | Spain              | L    | 2002  | 2010 |
| 3    | Andy Roddick        | United States      | R    | 2000  | 2010 |
| 4    | Lleyton Hewitt      | Australia          | R    | 1997  | 2010 |
| 5    | Nikolay Davydenko   | Russian Federation | R    | 2000  | 2010 |
| 6    | Ivan Ljubicic       | Croatia            | R    | 1978  | 2010 |
| 7    | Juan Carlos Ferrero | Spain              | R    | 1978  | 2010 |
| 8    | Novak Djokovic      | Serbia             | R    | 2004  | 2010 |
| 9    | David Nalbandian    | Argentina          | R    | 2000  | 2010 |
| 10   | Tommy Robredo       | Spain              | R    | 1999  | 2010 |
| 11   | David Ferrer        | Spain              | R    | 2002  | 2010 |
| 12   | Fernando Gonzalez   | Chile              | R    | 1999  | 2010 |
| 13   | Andy Murray         | Great Britain      | R    | 2005  | 2010 |
| 14   | Carlos Moya         | Spain              | R    | 1995  | 2010 |
| 15   | Mikhail Youzhny     | Russian Federation | R    | 1999  | 2010 |
| 16   | James Blake         | United States      | R    | 1998  | 2010 |
| 17   | Tommy Haas          | United States      | R    | 1996  | 2010 |
| 18   | Fernando Verdasco   | Spain              | L    | 2002  | 2010 |
| 19   | Marat Safin         | Russian Federation | R    | 1997  | 2009 |
| 20   | Tomas Berdych       | Czech Republic     | R    | 2003  | 2010 |
| 21   | Juan Ignacio Chela  | Argentina          | R    | 1999  | 2010 |
| 22   | Radek Stepanek      | Czech Republic     | R    | 1998  | 2010 |
| 23   | Andre Agassi        | United States      | R    | 1986  | 2006 |
| 24   | Robin Soderling     | Sweden             | R    | 2001  | 2010 |
| 25   | Rainer Schuettler   | Germany            | R    | 1995  | 2010 |
| 26   | Feliciano Lopez     | Spain              | L    | 1998  | 2010 |
| 27   | Tim Henman          | Great Britain      | R    | 1994  | 2007 |
| 28   | Jarkko Nieminen     | Finland            | L    | 2000  | 2010 |
| 29   | Mardy Fish          | United States      | R    | 2000  | 2010 |
| 30   | Gaston Gaudio       | Argentina          | R    | 1999  | 2010 |
